# Supplementary material
Source: publisher site journal article supplement (https://www.dovepress.com/article/439845)
Supplement: Supplementary file 1 [file get_supplementary_file.php]

## 1 Supplementary Figure 1: Correlation Lollipop Plot.

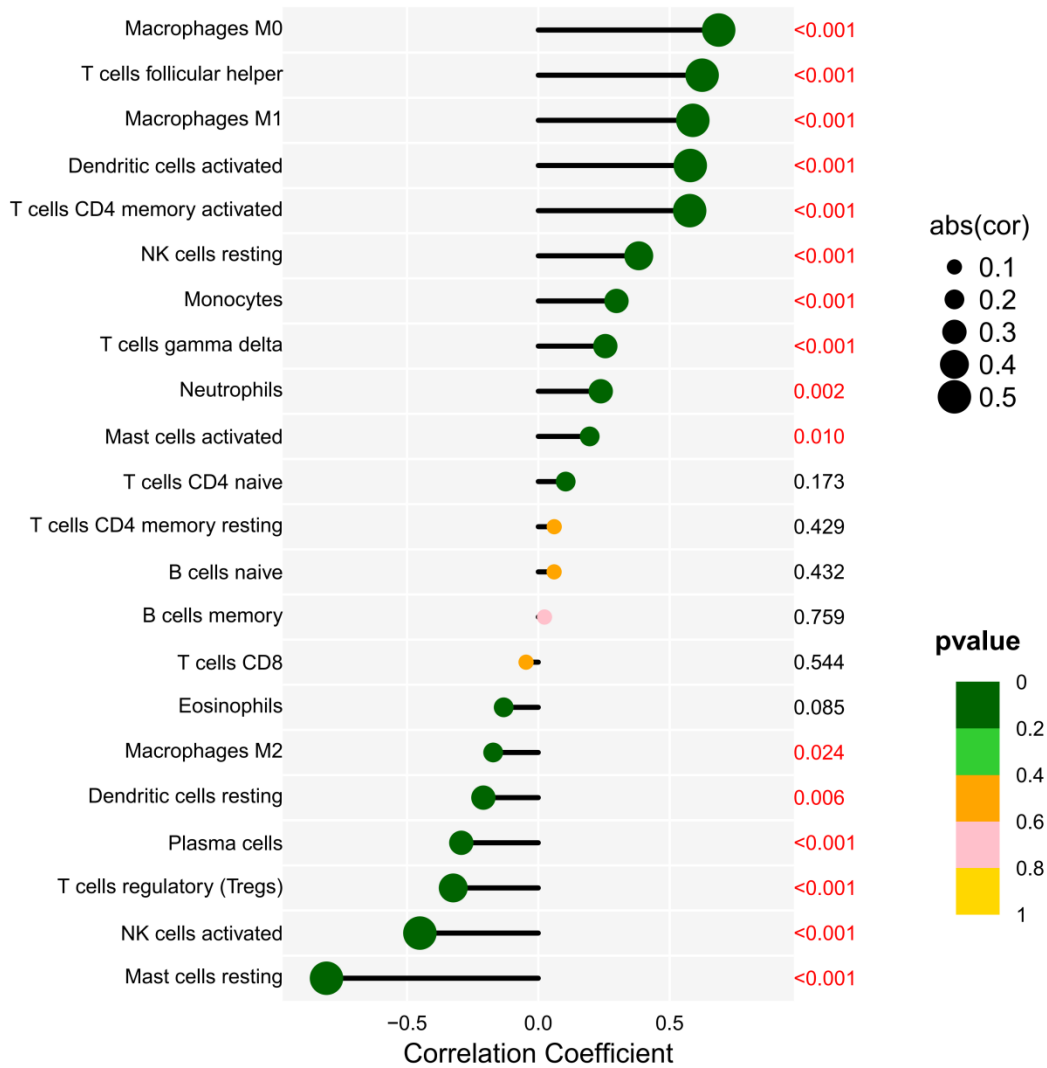

This plot shows the correlation between immune cell types and characteristic genes. Each immune cell type is represented on the vertical axis, and the correlation coefficient between the immune cell and the gene is represented on the horizontal axis. The size of each circle represents the absolute value of the correlation coefficient, while the color of the circle represents the P-value of the correlation test. A P-value less than 0.05 indicates a significant correlation between the immune cell type and characteristic gene, as denoted by red font on the right side of the figure.

## 2 Supplementary Table 1: Primer sequences for qRT-PCR.

| Gene   | Forward sequence          | Reverse sequence        |
|--------|---------------------------|-------------------------|
| SPRR1B | GGCCACCAGATGCTGAATCC      | GCTCTGGTACTAAGACCTTCAGC |
| IL-17  | GAAGACCTCATTGGTGCTCACTGCT | TCTCTCAGGGTCCTCATTGCG   |
| IL-22  | GAATTGTCTGCAATGGCCGC      | ATCAGCCAAGCTAGCCTCCTT   |
| KRT6   | TGTACCAGACCAAGTGTGCC      | ATTCGCCAGACATCCTGCAC    |
| KRT16  | TCTTCCCGCGAGGTCTTCAC      | ATTAGCCCACCACCAGCAGA    |
| GAPDH  | GAAGGTGAAGGTCGGAGTC       | GAAGATGGTGATGGGATTTC    |
